# Supplementary material
Source: bioRxiv or medRxiv preprint supplement (https://www.biorxiv.org/content/biorxiv/early/2021/05/08/2021.05.07.443164.1/DC4/embed/media-4.pdf)
Supplement: Supplementary file [file media-4.pdf]

**Supplementary Table 4: Primer sequences**

| <b>Gene</b>    | <b>forward sequence (5' to 3')</b> | <b>reverse sequence (5' to 3')</b> |
|----------------|------------------------------------|------------------------------------|
| <i>ATP5B</i>   | TCACCCAGGCTGGTTCAGA                | AGTGGCCAGGGTAGGCTGAT               |
| <i>RPL13A</i>  | AAGGTGGTGGTCGTACGCTGTG             | CGGGAAGGGTTGGTGTTCATCC             |
| <i>KRT5</i>    | AGGAGTTGGACCAAGTCAACAT             | TGGAGTAGTAGCTTCCACTGC              |
| <i>TP63</i>    | CCACCTGGACGTATTCCACTG              | TCGAATCAAATGACTAGGAGGGG            |
| <i>KRT8</i>    | TCCTCAGGCAGCTATATGAAGAG            | GGTTGGCAATATCCTCGTACTGT            |
| <i>FOXJ1</i>   | GGAGGGGACGTAAATCCCTA               | TTGGTCCCAGTAGTTCACGC               |
| <i>SCGB1A1</i> | ACATGAGGGAGGCAGGGGCTC              | ACTCAAAGCATGGCAGCGGCA              |
| <i>MUC5AC</i>  | CCTTCGACGGACAGAGCTAC               | TCTCGGTGACAACACGAAAG               |
| <i>PTGS2</i>   | TAAGTGCGATTGTACCCGGAC              | TTTGTAGCCATAGTCAGCATTGT            |
